# Supplementary material for: Protective Effects of Anthocleista djalonensis Extracts against Pentylenetetrazole-Induced Epileptic Seizures and Neuronal Cell Loss: Role of Antioxidant Defense System
Source: Hindawi journal article supplement (doi:10.1155/2021/5523705), 2021-08-30
Supplement: f1 [file 5523705.f1.pdf]

# UNIVERSITY OF BUEA

P.O. Box 63,  
Buea, CAMEROON  
Tel: (237) 233 32 21 34/233 32 46 90/233 32 47 13  
Fax: (237) 233 32 22 79

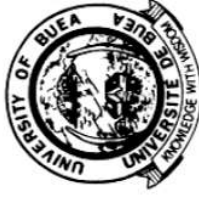

REPUBLIC OF CAMEROON  
PEACE - WORK - FATHERLAND

## UNIVERSITY OF BUEA-INSTITUTIONAL ANIMAL CARE AND USE COMMITTEE (UB-IACUC)

Credited by Decision No. 2016/0877/UB/BTU/VC of 23<sup>rd</sup> September 2016

**Chair:** Associate Professor Jane-Francis Akoachere  
**Secretary:** Dr Rene Billingwe Ayiseh

Your Ref: \_\_\_\_\_

Our Ref: 2019/ 002 / UB/IACUC/BTU/FS

Date: 30-01-2019

### Notice of UB-IACUC Approval

**Application number:** 017

**Permit number:** UB-IACUC N° 002/2019

**Principal Investigator:** Bila Raymond Bess

**Study title:** *Neuroprotective effects of Cymbopogon citratus, Anthocleista djalonensis, and Crassocephalum bauchiense extracts in mice models of epileptic seizures and cerebral malaria.*

**Application type:** *Initial*

**Sponsor:** *Student*

**Date of Approval:** 30/01/2019

**Duration of Approval:** *1 year*

#### **Principal Investigator (PI)'s responsibilities:**

1. The study must be conducted in strict accordance with the protocol approved by the Committee.
2. Changes to the protocol must be submitted to the Committee using the UB-IACUC Minor Amendment form for approval before implementation.
3. The PI is responsible for the conduct of the study. The study must be implemented according to national and international guidelines for the ethical conduct of animal research. The PI must collaborate with the Committee monitoring the implementation of the protocol. The Committee has the right to carry out in promptus visits to your animal facility/site of experiment after approval of your protocol.
4. Any future correspondence must include the application number and the PI's name in the subject line.
5. A renewal application or project closure report must be submitted to the Committee at least one month prior to the expiration. This must be done using the UB-IACUC PI's report back form in hard copy at the secretariat in the Biotechnology Unit and via email to [ubiacuc@gmail.com](mailto:ubiacuc@gmail.com) making reference to your application number.

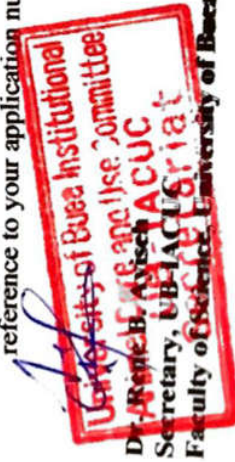

Assoc. Prof. Jane-Francis Akoachere  
Chair, UB-IACUC  
Faculty of Science, University of Buea
